# Supplementary material
Source: publisher figshare collection journal article supplement (https://plos.figshare.com/articles/dataset/_/125271)
Supplement: Supplementary file 1 [file 1]

Archive with 4 entries (4 files):
- Figure_S1.pdf
- Figure_S2.pdf
- Table_S1.pdf
- Table_S2.pdf
