# Supplementary material
Source: publisher figshare collection journal article supplement (https://plos.figshare.com/articles/dataset/_/125271)
Supplement: Supplementary file 1 [file 1 › Table_S1.pdf]

**Table S1.** Combinatory effects of etoposide and inhibitors targeting PI3K-Akt-mTOR pathway in human pancreatic and breast cancer cells.

| Cells  | Agent        | IC <sub>50</sub> (μM) <sup>a</sup> |         | p value <sup>b</sup> |         |
|--------|--------------|------------------------------------|---------|----------------------|---------|
|        |              | Neg. siRNA                         | siFKBP5 | Neg. siRNA           | siFKBP5 |
| BXPC3  | Eto          | 0.806                              | 0.5229  |                      |         |
|        | Eto+TCN      | 0.535                              | 0.4616  | 0.0005               | 0.0003  |
|        | Eto+LY294002 | 0.5586                             | 0.5418  | 0.0023               | 0.001   |
|        | Eto+Rap      | 2.503                              | 2.371   | 0.1509               | 0.1755  |
| ASPC1  | Eto          | 5.109                              | 12.1    |                      |         |
|        | Eto+TCN      | 4.125                              | 0.2513  | 0.001                | 0.0007  |
|        | Eto+LY294002 | 3.822                              | 4.252   | 0.1985               | 0.0216  |
|        | Eto+Rap      | 24.16                              | 10.96   | 0.0171               | 0.2744  |
| MCF7   | Eto          | 0.9081                             | 4.953   |                      |         |
|        | Eto+TCN      | 0.498                              | 1.774   | 0.0036               | 0.0003  |
|        | Eto+LY294002 | 0.6957                             | 2.472   | 0.0045               | 0.0054  |
|        | Eto+Rap      | 1.468                              | 5.026   | 0.9096               | 0.0769  |
| HS578T | Eto          | 0.9653                             | 1.651   |                      |         |
|        | Eto+TCN      | 0.4204                             | 0.7752  | 0.003                | 0.001   |
|        | Eto+LY294002 | 0.6424                             | 0.9473  | 0.3412               | 0.0099  |
|        | Eto+Rap      | 0.6865                             | 1.215   | 0.931                | 0.0342  |

<sup>a</sup> The values represent the average of three independent experiments.

<sup>b</sup> IC<sub>50</sub> values between combination treatment vs. Eto along were analyzed statistically by performing t tests  
Abbreviations: Eto, etoposide; TCN, tricitriline; Rap, rapamycin
