# Supplementary material
Source: publisher figshare collection journal article supplement (https://plos.figshare.com/articles/dataset/_/125271)
Supplement: Supplementary file 1 [file 1 › Table_S2.pdf]

**Table S2.** Combinatory effects of paclitaxel and inhibitors targeting PI3K-Akt-mTOR pathway in human pancreatic and breast cancer cells.

| Cells  | Agent        | IC <sub>50</sub> (μM) <sup>a</sup> |          | p value <sup>b</sup> |         |
|--------|--------------|------------------------------------|----------|----------------------|---------|
|        |              | Neg. siRNA                         | siFKBP5  | Neg. siRNA           | siFKBP5 |
| BXPC3  | Tax          | 0.01033                            | 0.02604  |                      |         |
|        | Tax+TCN      | 0.007907                           | 0.01524  | 0.005                | 0.004   |
|        | Tax+LY294002 | 0.01149                            | 0.0247   | 0.8405               | 0.7542  |
|        | Tax+Rap      | 0.01495                            | 0.02059  | 0.9634               | 0.3702  |
| ASPC1  | Tax          | 0.003702                           | 0.008071 |                      |         |
|        | Tax+TCN      | 0.001794                           | 0.004039 | 0.0071               | 0.005   |
|        | Tax+LY294002 | 0.002507                           | 0.00666  | 0.006                | 0.1042  |
|        | Tax+Rap      | 0.004582                           | 0.005431 | 0.1154               | 0.005   |
| MCF7   | Tax          | 0.009508                           | 0.01571  |                      |         |
|        | Tax+TCN      | 0.004629                           | 0.005816 | 0.0046               | 0.0003  |
|        | Tax+LY294002 | 0.007369                           | 0.009197 | 0.0045               | 0.0054  |
|        | Tax+Rap      | 0.006446                           | 0.00876  | 0.9096               | 0.0769  |
| HS578T | Tax          | 0.01019                            | 0.02712  |                      |         |
|        | Tax+TCN      | 0.00696                            | 0.01014  | 0.007                | 0.006   |
|        | Tax+LY294002 | 0.01133                            | 0.01897  | 0.2457               | 0.0157  |
|        | Tax+Rap      | 0.009164                           | 0.01654  | 0.6941               | 0.006   |

<sup>a</sup> The values represent the average of three independent experiments.

<sup>b</sup> IC<sub>50</sub> values between combination treatment vs. Tax alone were analyzed statistically by performing t tests  
Abbreviations: Tax, paclitaxel; TCN, tricirbine; Rap, rapamycin
