# Supplementary material
Source: publisher figshare collection journal article supplement (https://plos.figshare.com/articles/dataset/_/125271)

Figure S1

(A)

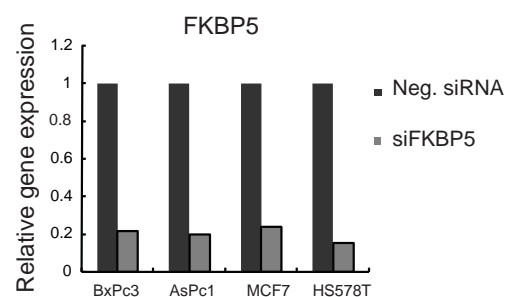

(B)

BXPC3

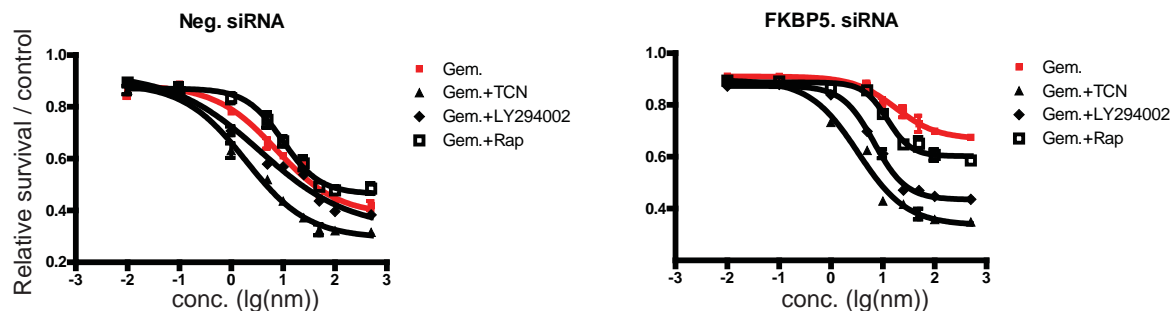

(C)

ASPC1

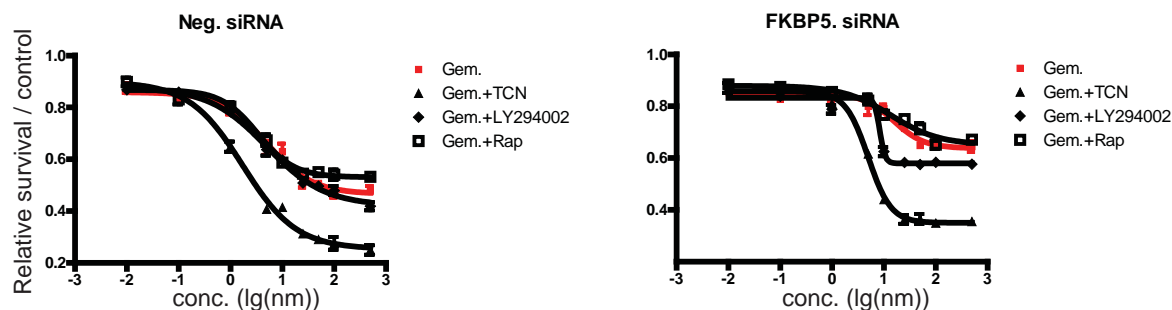

(D)

SU86

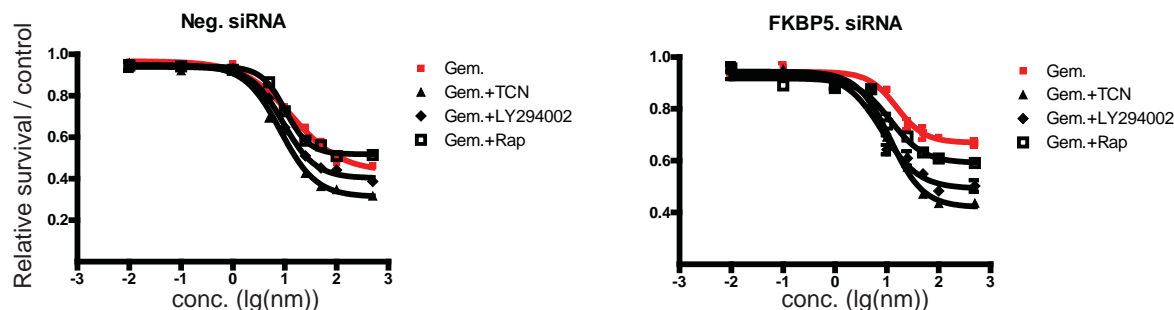

(E)

MCF7

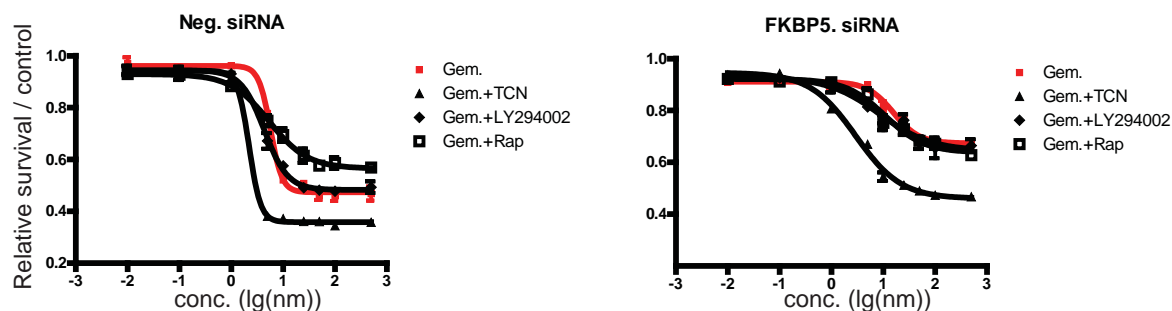

(F)

HS578T

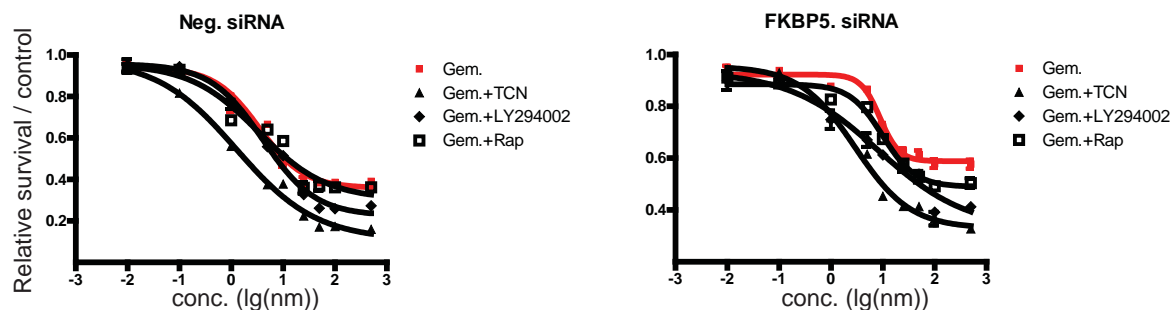

Supplement: Supplementary file 1 [file 1 › Figure_S1.pdf]

Figure S2

(A)

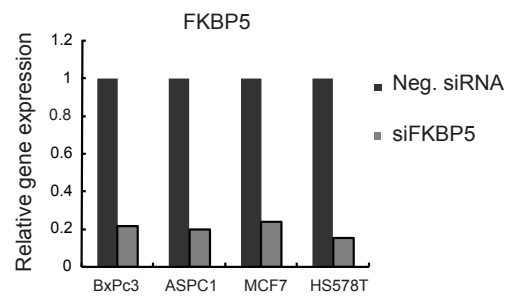

(B)

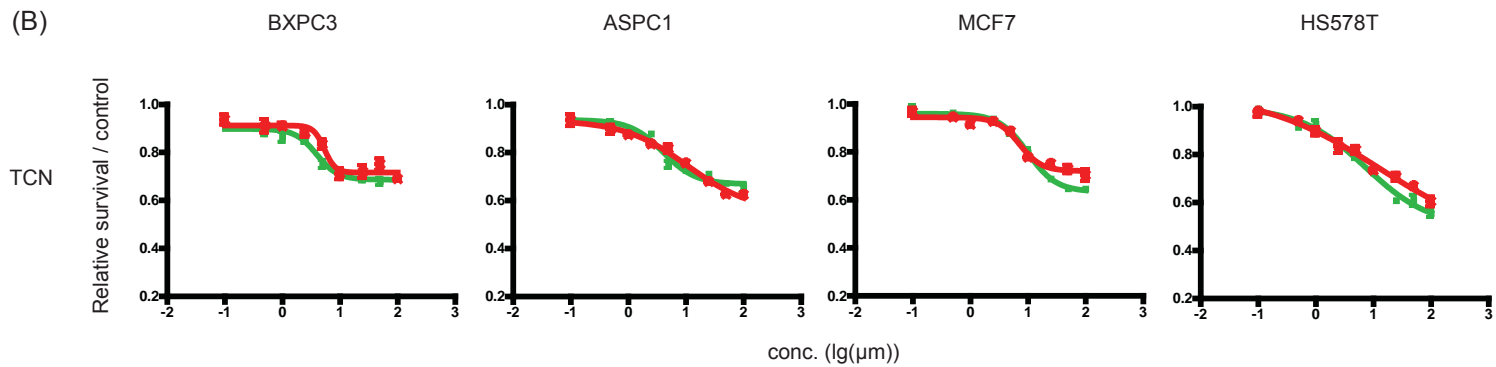

(C)

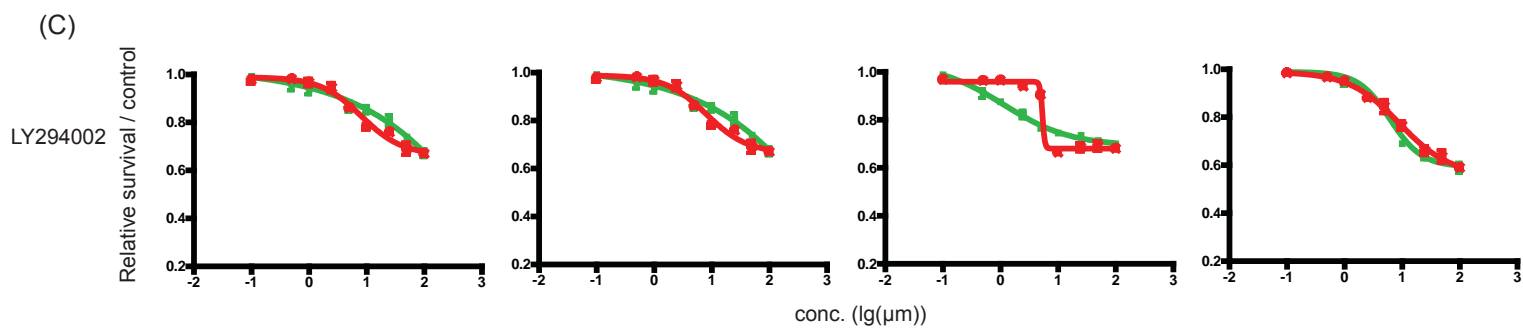

(D)

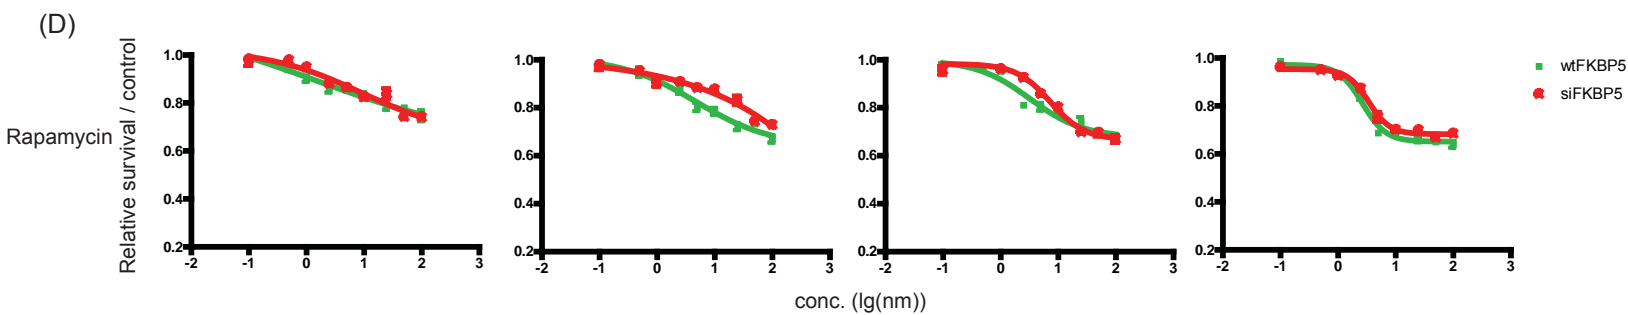

Supplement: Supplementary file 1 [file 1 › Figure_S2.pdf]
